# Supplementary material
Source: HighWire-hosted journal article supplement (https://jitc.bmj.com/content/11/3/e006408)
Supplement: inline-supplementary-material-4 [file inline-supplementary-material-4.pdf]

Supplementary Figure 3.

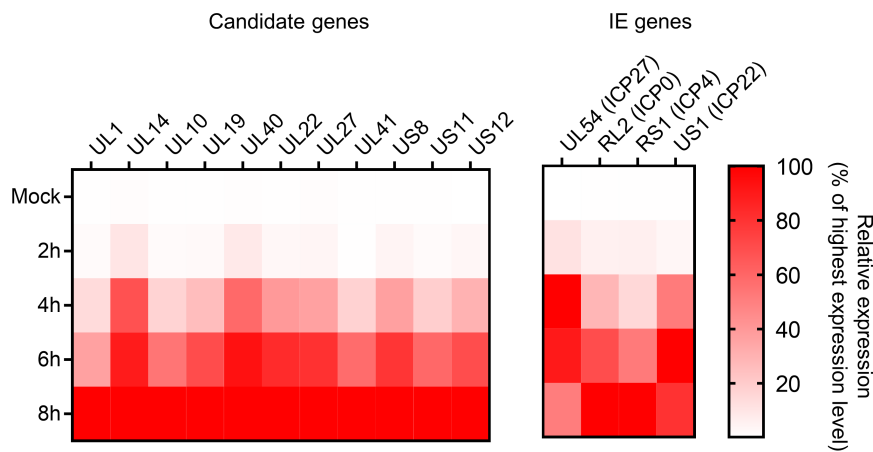

**Supplementary Figure 3.** Relative mRNA expression level of the 10 late genes selected as candidates (left heatmap), as well as 4 immediate early genes (right heatmap). mRNA expression were obtained from a previous study by Rutkowski *et al.*, 2015. Expression level was normalized as a percentage of the highest expression level across all time points.
