# Supplementary material
Source: HighWire-hosted journal article supplement (https://jitc.bmj.com/content/11/3/e006408)
Supplement: inline-supplementary-material-6 [file inline-supplementary-material-6.pdf]

**Supplementary Figure 5. Characterizing expression enhancement by US11 5' Leader in oncolytic HSV1.** (A) . Monolayer of Vero cells was infected with the indicated virus at a MOI of 5, and the culture supernatant was collected 24 hours post infection. GM-CSF concentration was quantified by ELISA. One-way ANOVA with Dunnett's post-hoc test was performed.  $n = 3$  biological replicates. Error bars:  $\pm$  sd. \*\*\*\* $p < 0.0001$ . (B) Representative GFP fluorescence of HSV1 expressing Leaderless CSF2-GFP or US11 5'leader-CSF2-GFP. Monolayer of CT26 was infected with the indicated virus at an MOI of 5, then fluorescence microscopy images were taken at 24 hours post-infection. (C) Time course of GFP fluorescence of HSV1 expressing Leaderless CSF2-GFP or US11 5'leader-CSF2-GFP. Monolayer of CT26 was infected with the indicated virus at an MOI of 0.2, 1 or 5, then GFP fluorescence was monitored over 2 days post-infection using the Incucyte live cell imaging system. (D) Dose dependency analysis of secreted GM-CSF. CT26 cells were infected with the indicated virus at an MOI of 0.2, 1 or 5, then culture supernatant was collected 24 hours post-infection. GM-CSF concentration was quantified using ELISA. Two-way ANOVA with Sidak post-hoc test was performed.  $n = 3$  biological replicates. Error bars:  $\pm$  sd. \*\*\*\* $p < 0.0001$ .
