# Supplementary material
Source: HighWire-hosted journal article supplement (https://jitc.bmj.com/content/11/3/e006408)
Supplement: inline-supplementary-material-7 [file inline-supplementary-material-7.pdf]

## Supplementary Figure 6.

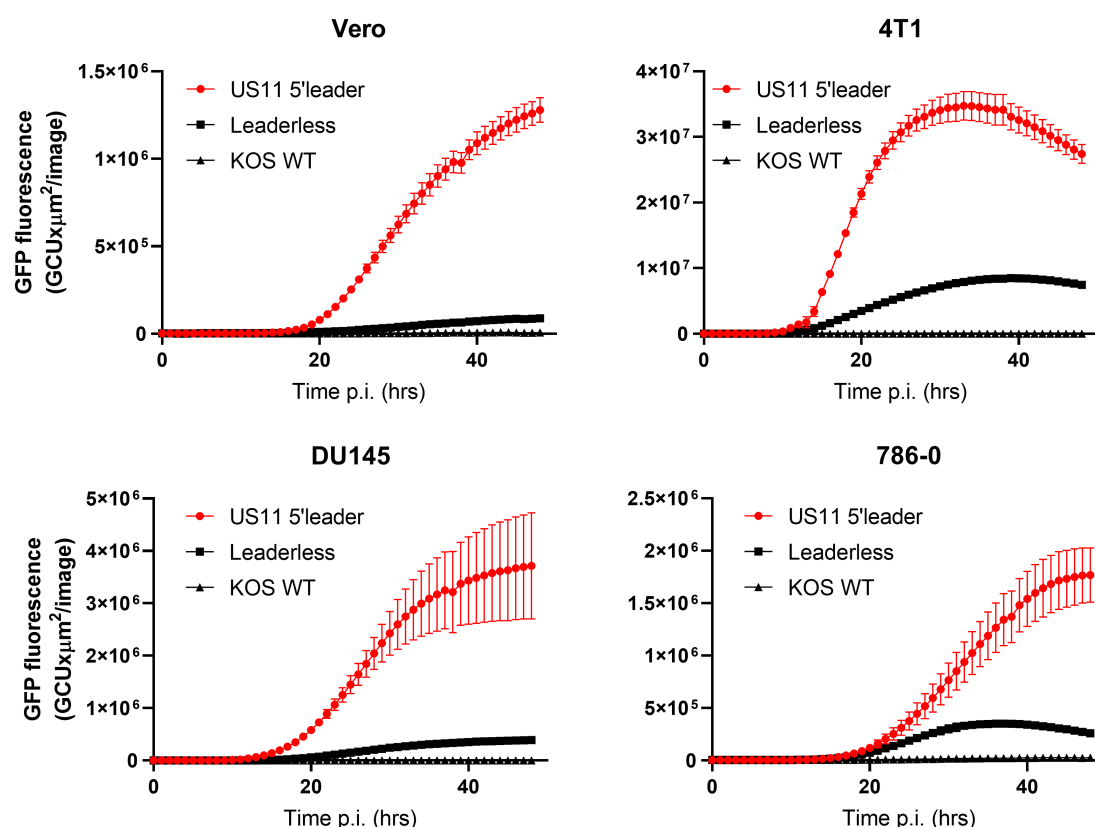**Supplementary Figure 6. US11 5'leader enhancement is robust in different cell types and species.**

Monolayer of the African green monkey kidney cell line Vero, mouse breast cancer cell line 4T1, human pancreatic cancer cell line DU145 and human renal carcinoma cell line 786-O were infected with HSV1 KOS, HSV1 Csf2 or HSV1 US11-Csf2 at an MOI of 0.1, then GFP fluorescence intensity was followed for 48 hours using the Incucyte live cell imaging system.
