# Supplementary material
Source: HighWire-hosted journal article supplement (https://jitc.bmj.com/content/11/3/e006408)
Supplement: inline-supplementary-material-9 [file inline-supplementary-material-9.pdf]

Supplementary Figure 8.

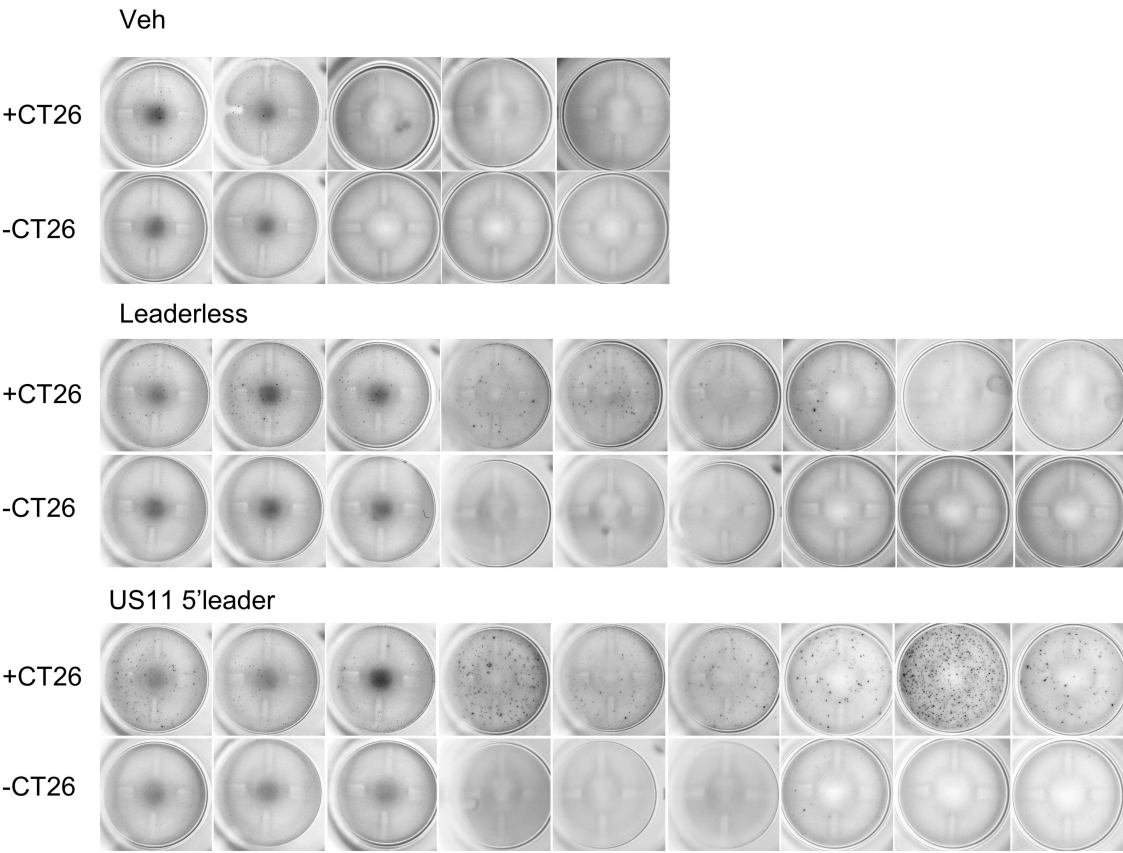

**Supplementary Figure 8. Raw data of individual wells from the IFN $\gamma$  ELISPOT experiment in Figure 5D.**
